# Supplementary material for: Association of Irisin Plasma Levels with Anthropometric Parameters in Children with Underweight, Normal Weight, Overweight, and Obesity
Source: Hindawi journal article supplement (doi:10.1155/2017/2628968), 2017-01-01
Supplement: f1 [file 2628968.f1.pdf]

# SUPPLEMENTAL MATERIAL

## Supplemental Table 1. Correlation coefficients between irisin plasma levels and body composition parameters

Supplemental table

|                           | Gender | Age     | Height (cm) | Body weight (kg) | BMI (kg/m <sup>2</sup> ) | BMI (percentil) | Waist (cm) | MUAC (cm) | Fat mass (kg) | Fat mass (%) | Body muscle mass (kg) | Fat-free mass (kg) | Glucose (mg/dl) | Albumin (g/dl) | Total cholesterol (mg/dl) | HDL (mg/dl) | LDL (mg/dl) | Triglycerides (mg/dl) | Irisin (ng/mL) |   |
|---------------------------|--------|---------|-------------|------------------|--------------------------|-----------------|------------|-----------|---------------|--------------|-----------------------|--------------------|-----------------|----------------|---------------------------|-------------|-------------|-----------------------|----------------|---|
| Gender                    | 1      | -0.0506 | -0.0910     | -0.00866         | 0.0108                   | -0.0153         | -0.0585    | 0.0693    | 0.0823        | 0.143        | 0.178                 | -0.0996            | -0.0845         | 0.292          | 0.0368                    | -0.483*     | 0.0520      | 0.275                 | -0.418*        |   |
| Age                       |        | 1       | 0.814*      | 0.436*           | 0.0824                   | -0.163          | 0.246      | 0.177     | 0.141         | -0.0612      | 0.481*                | 0.666*             | -0.179          | -0.159         | 0.132                     | 0.208       | 0.126       | -0.0686               | 0.126          |   |
| Height (cm)               |        |         | 1           | 0.795*           | 0.453*                   | 0.239           | 0.636*     | 0.574*    | 0.540*        | 0.349*       | 0.646*                | 0.917*             | -0.216          | -0.0931        | 0.117                     | 0.0626      | 0.0736      | 0.162                 | 0.284          |   |
| Body weight (kg)          |        |         |             | 1                | 0.901*                   | 0.862*          | 0.940*     | 0.935*    | 0.934*        | 0.806*       | 0.472*                | 0.929*             | -0.169          | 0.0351         | 0.267                     | -0.0806     | 0.181       | 0.410*                | 0.345*         |   |
| BMI (kg/m <sup>2</sup> )  |        |         |             |                  | 1                        | 0.845*          | 0.934*     | 0.965*    | 0.961*        | 0.942*       | 0.265                 | 0.714*             | -0.0650         | 0.0977         | 0.346*                    | -0.106      | 0.253       | 0.464*                | 0.307          |   |
| BMI (percentil)           |        |         |             |                  |                          | 1               | 0.783*     | 0.825*    | 0.736*        | 0.866*       | 0.239                 | 0.493*             | 0.0269          | 0.0824         | 0.337*                    | -0.163      | 0.247       | 0.508*                | 0.387*         |   |
| Waist (cm)                |        |         |             |                  |                          |                 | 1          | 0.947*    | 0.922*        | 0.873*       | 0.379*                | 0.827*             | -0.0820         | 0.0728         | 0.386*                    | -0.129      | 0.294       | 0.471*                | 0.373*         |   |
| MUAC (cm)                 |        |         |             |                  |                          |                 |            | 1         | 0.934*        | 0.898*       | 0.447                 | 0.805*             | -0.142          | 0.0578         | 0.317*                    | -0.129      | 0.226       | 0.451*                | 0.266          |   |
| Fat mass (kg)             |        |         |             |                  |                          |                 |            |           | 1             | 0.935*       | 0.239                 | 0.735*             | -0.126          | 0.108          | 0.289                     | -0.141      | 0.188       | 0.507*                | 0.290          |   |
| Fat mass (%)              |        |         |             |                  |                          |                 |            |           |               | 1            | 0.167                 | 0.560*             | -0.0820         | 0.178          | 0.291                     | -0.206      | 0.193       | 0.560*                | 0.276          |   |
| Body muscle mass (kg)     |        |         |             |                  |                          |                 |            |           |               |              | 1                     | 0.648*             | -0.192          | 0.0785         | 0.231                     | -0.130      | 0.177       | 0.176                 | -0.027         |   |
| Fat-free mass (kg)        |        |         |             |                  |                          |                 |            |           |               |              |                       | 1                  | -0.178          | -0.0446        | 0.228                     | 0.00206     | 0.171       | 0.250                 | 0.353*         |   |
| Glucose (mg/dl)           |        |         |             |                  |                          |                 |            |           |               |              |                       |                    | 1               | 0.383*         | -0.0247                   | -0.127      | 0.00357     | 0.206                 | 0.0741         |   |
| Albumin (g/dl)            |        |         |             |                  |                          |                 |            |           |               |              |                       |                    |                 | 1              | 0.192                     | -0.304      | 0.200       | 0.161                 | -0.0757        |   |
| Total cholesterol (mg/dl) |        |         |             |                  |                          |                 |            |           |               |              |                       |                    |                 |                | 1                         | 0.0210      | 0.968*      | 0.213                 | 0.201          |   |
| HDL (mg/dl)               |        |         |             |                  |                          |                 |            |           |               |              |                       |                    |                 |                |                           | 1           | 0.00310     | -0.493*               | 0.209          |   |
| LDL (mg/dl)               |        |         |             |                  |                          |                 |            |           |               |              |                       |                    |                 |                |                           |             | 1           | 0.0766                | 0.208          |   |
| Triglycerides (mg/dl)     |        |         |             |                  |                          |                 |            |           |               |              |                       |                    |                 |                |                           |             |             | 1                     | -0.0380        |   |
| Irisin (ng/mL)            |        |         |             |                  |                          |                 |            |           |               |              |                       |                    |                 |                |                           |             |             |                       |                | 1 |

Correlation coefficients are shown, calculated by Pearson product moment or Spearman rank order methods depending on normality of data; \*p < 0.05.

**Supplemental Table 2. General linear models of variables associated with circulating irisin levels, after controlling for gender and age.**

| <b>Variables</b>                             | <b>Main Effect<br/>(B/p)</b> |
|----------------------------------------------|------------------------------|
| Weight (kg)                                  | 1.37/0.104                   |
| Height (cm)                                  | 0.634/0.155                  |
| Plication (mm)                               | 0.296/0.636                  |
| Plication Percentile (fraction)              | 0.094/0.437                  |
| Waist (cm)                                   | 0.393/0.573                  |
| Waist Percentile (fraction)                  | 0.131/0.411                  |
| Height-Age Percentile (fraction)             | 0.144/0.122                  |
| <b>Body Mass Index (kg/m<sup>2</sup>)</b>    | <b>1.36/0.017</b>            |
| <b>Body Mass Index Percentile (fraction)</b> | <b>0.17/0.005</b>            |
| Fat percentage (fraction)                    | 0.336/0.653                  |
| Body Muscle Mass (kg)                        | -0.613/0.666                 |
| Total body fat (kg)                          | 1.3/0.39                     |
| Weekly Activity (days/week)                  | -1.61/0.14                   |
| Daily Activity (hours/day)                   | -0.445/0.827                 |
| Weekly TV (days/week)                        | -2.16/0.345                  |
| Daily TV (hours/day)                         | 1.47/0.4                     |
| Mid-upper arm circumference (cm)             | -1.51/0.542                  |
| Fat free mass (kg)                           | 1.56/0.148                   |
| Glucose (mg/dl)                              | 0.066/0.663                  |
| Albumin (g/dl)                               | -0.852/0.879                 |
| Total cholesterol (mg/dl)                    | -0.007/0.946                 |
| High Density Lipoprotein (mg/dl)             | -0.284/0.668                 |
| Triacylglycerides (mg/dl)                    | -0.078/0.432                 |
